# Supplementary material for: N-Fluoro functionalization of heterocyclic azoles: a new strategy towards insensitive high energy density materials
Source: Royal Society of Chemistry journal article supplement (doi:10.1039/c8nj03748e), 2018-01-01
Supplement: c8nj03748e1.pdf [file c8nj03748e1.pdf]

## Supplementary materials

### N-Fluoro functionalization of heterocyclic azoles: a new strategy towards insensitive high energy density materials

Teng Fei, Yao Du, Peng Chen, Chunlin He\* and Siping Pang\*

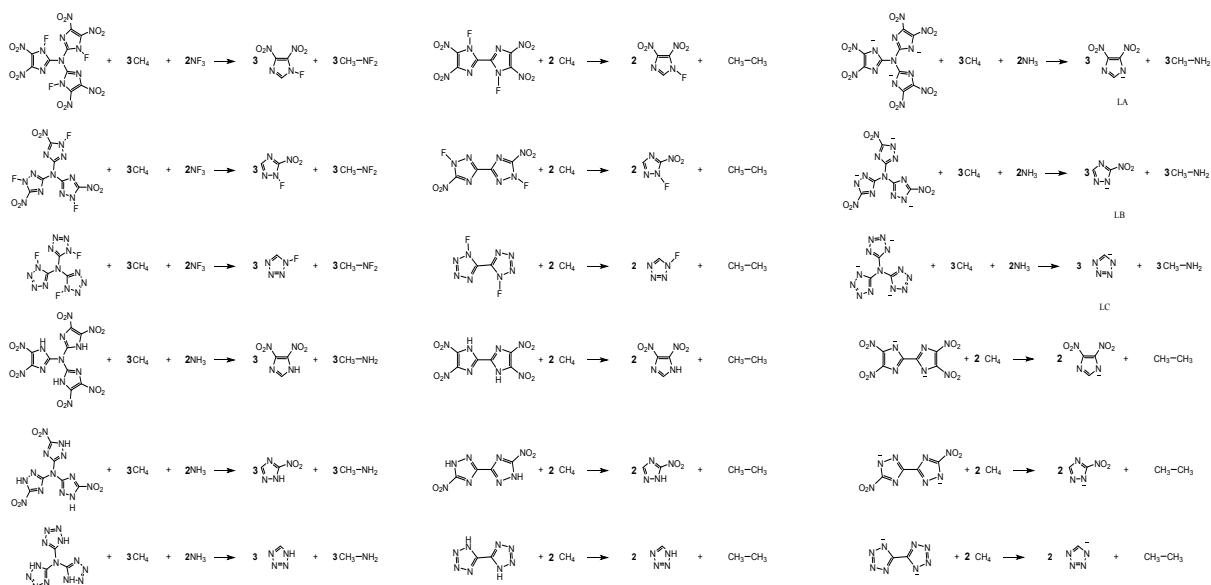

Scheme S1 The isodesmic reactions used to calculate heats of formation.

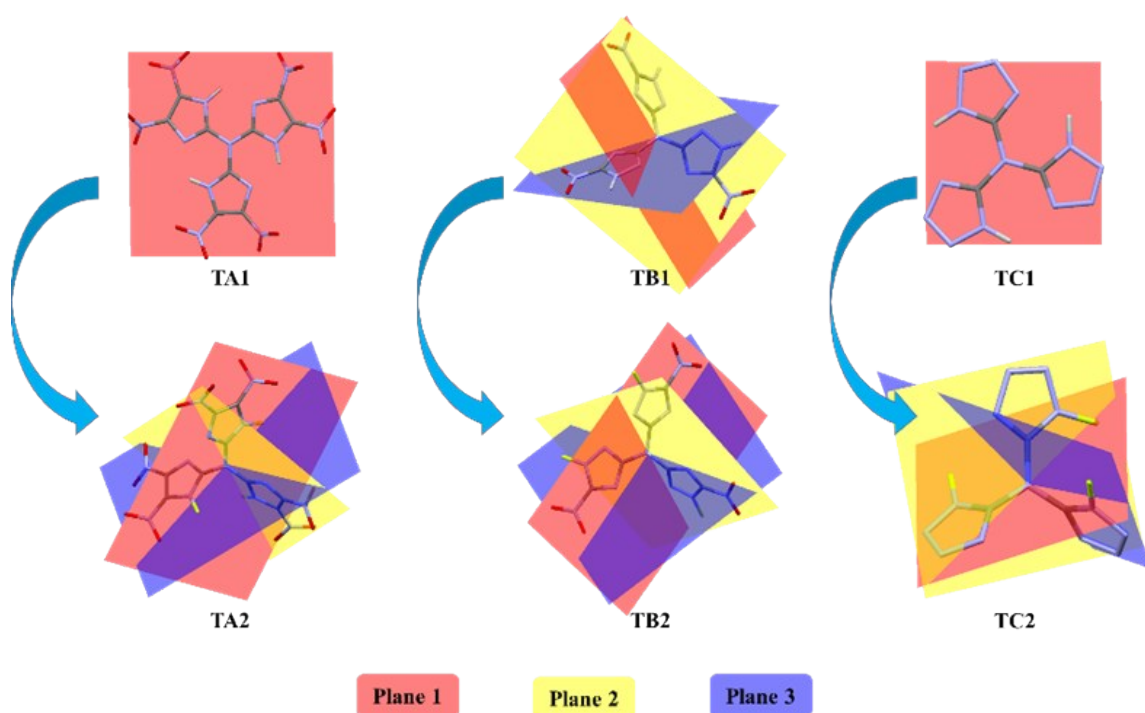

Fig. S1 The angle changes after N-fluorination for *tri*-substituted series.

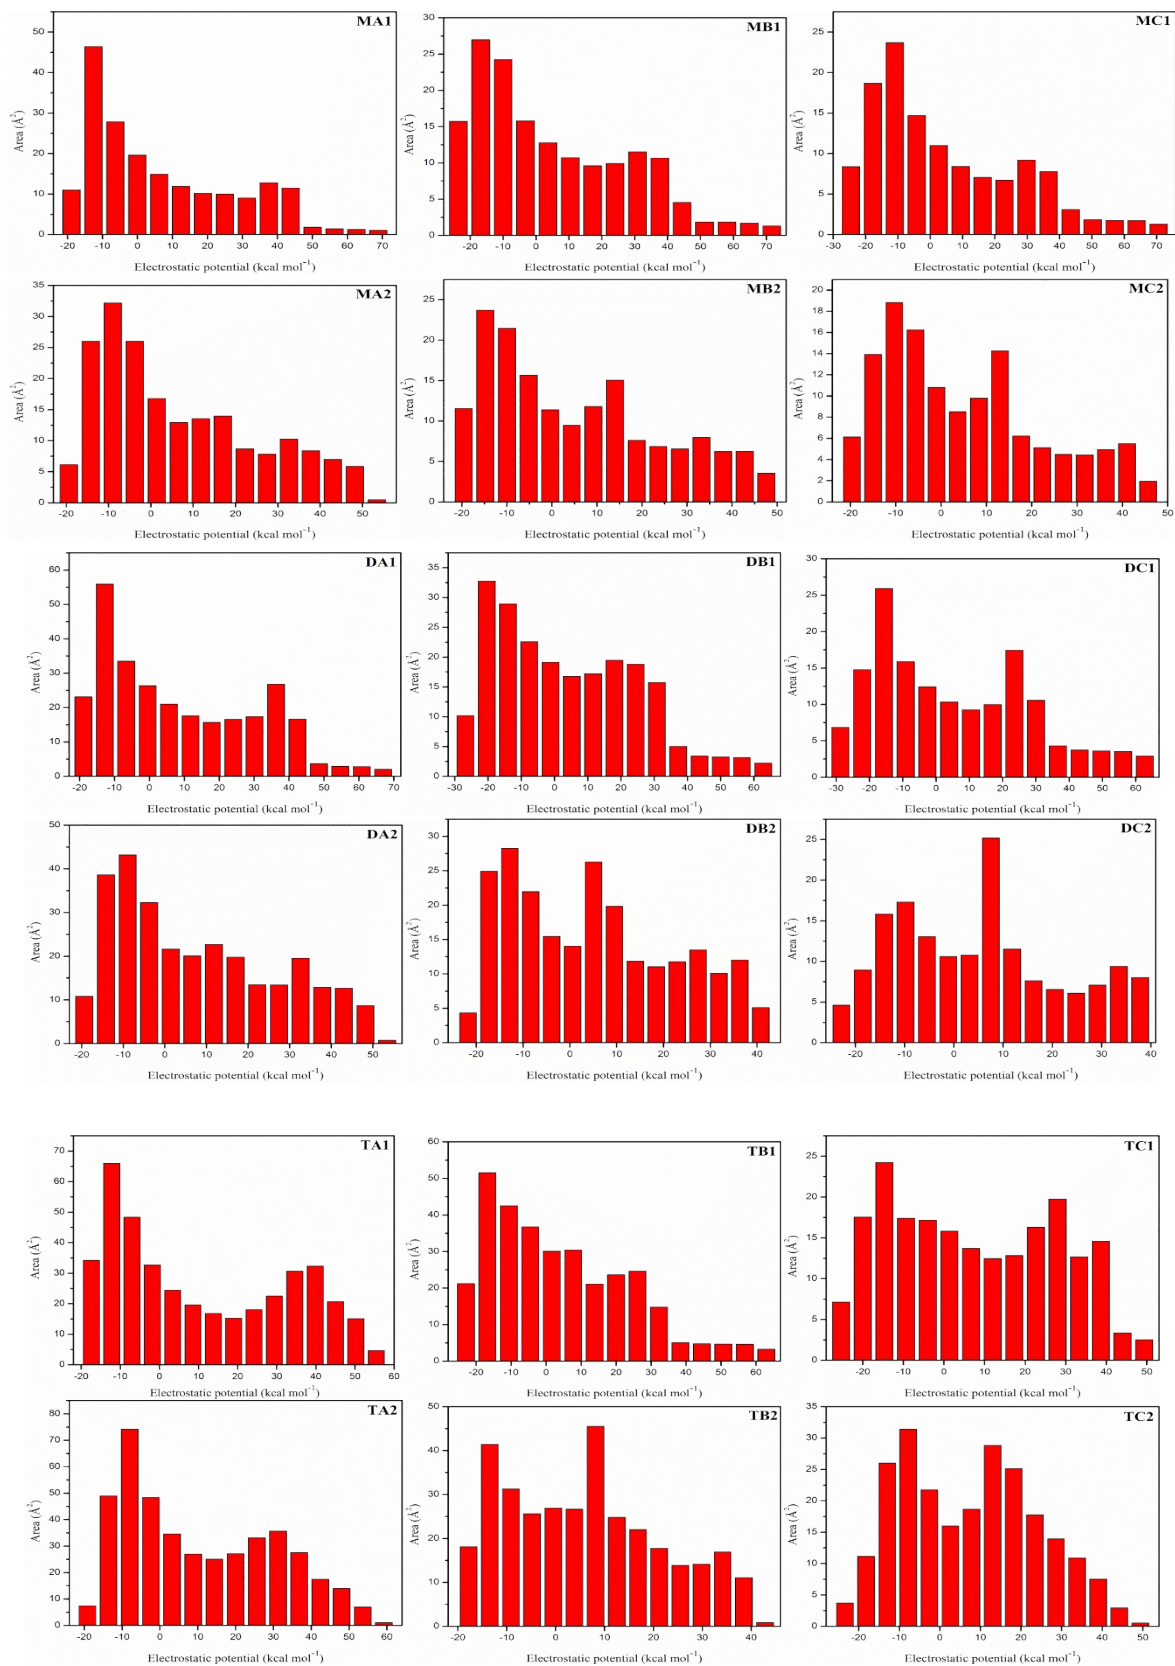

**Fig. S2** Area percent in each ESP range of MA1-TC2.

# Summary of surface analysis of compound MA1 to DC2.

## Compound MA1

Volume: 1248.09002 Bohr<sup>3</sup> (184.94790 Angstrom<sup>3</sup>)  
Minimal value: -21.02125 kcal/mol Maximal value: 71.43181 kcal/mol  
Overall surface area: 682.76183 Bohr<sup>2</sup> (191.19281 Angstrom<sup>2</sup>)  
Positive surface area: 339.66786 Bohr<sup>2</sup> (95.11670 Angstrom<sup>2</sup>)  
Negative surface area: 343.09397 Bohr<sup>2</sup> (96.07611 Angstrom<sup>2</sup>)  
Overall average value: 0.01092624 a.u. (6.85632 kcal/mol)  
Positive average value: 0.03839842 a.u. (24.09539 kcal/mol)  
Negative average value: -0.01627161 a.u. (-10.21060 kcal/mol)  
Overall variance ( $\sigma^2_{tot}$ ): 0.00074441 a.u.<sup>2</sup> (293.12463 (kcal/mol)<sup>2</sup>)  
Positive variance: 0.00068313 a.u.<sup>2</sup> (268.99504 (kcal/mol)<sup>2</sup>)  
Negative variance: 0.00006128 a.u.<sup>2</sup> (24.12959 (kcal/mol)<sup>2</sup>)  
Balance of charges ( $\mu$ ): 0.07554219  
Product of  $\sigma^2_{tot}$  and  $\mu$ : 0.00005623 a.u.<sup>2</sup> (22.14328 (kcal/mol)<sup>2</sup>)  
Internal charge separation ( $\Pi$ ): 0.02843921 a.u. (17.84589 kcal/mol)

## Compound MA2

Volume: 1287.21429 Bohr<sup>3</sup> (190.74552 Angstrom<sup>3</sup>)  
Minimal value: -20.01859 kcal/mol Maximal value: 55.00452 kcal/mol  
Overall surface area: 700.51635 Bohr<sup>2</sup> (196.16458 Angstrom<sup>2</sup>)  
Positive surface area: 361.42477 Bohr<sup>2</sup> (101.20926 Angstrom<sup>2</sup>)  
Negative surface area: 339.09157 Bohr<sup>2</sup> (94.95533 Angstrom<sup>2</sup>)  
Overall average value: 0.01054753 a.u. (6.61868 kcal/mol)  
Positive average value: 0.03416923 a.u. (21.44154 kcal/mol)  
Negative average value: -0.01462995 a.u. (-9.18044 kcal/mol)  
Overall variance ( $\sigma^2_{tot}$ ): 0.00058004 a.u.<sup>2</sup> (228.40274 (kcal/mol)<sup>2</sup>)  
Positive variance: 0.00051815 a.u.<sup>2</sup> (204.03004 (kcal/mol)<sup>2</sup>)  
Negative variance: 0.00006190 a.u.<sup>2</sup> (24.37270 (kcal/mol)<sup>2</sup>)  
Balance of charges ( $\mu$ ): 0.09532243  
Product of  $\sigma^2_{tot}$  and  $\mu$ : 0.00005529 a.u.<sup>2</sup> (21.77190 (kcal/mol)<sup>2</sup>)  
Internal charge separation ( $\Pi$ ): 0.02545499 a.u. (15.97326 kcal/mol)

## Compound MB1

Volume: 1001.78733 Bohr<sup>3</sup> (148.44960 Angstrom<sup>3</sup>)  
Minimal value: -25.38164 kcal/mol Maximal value: 73.48092 kcal/mol  
Overall surface area: 569.14787 Bohr<sup>2</sup> (159.37766 Angstrom<sup>2</sup>)  
Positive surface area: 275.30605 Bohr<sup>2</sup> (77.09356 Angstrom<sup>2</sup>)  
Negative surface area: 293.84182 Bohr<sup>2</sup> (82.28410 Angstrom<sup>2</sup>)  
Overall average value: 0.00808600 a.u. (5.07405 kcal/mol)

Positive average value: 0.03973621 a.u. (24.93487 kcal/mol)  
Negative average value: -0.02156768 a.u. (-13.53394 kcal/mol)  
Overall variance ( $\sigma^2_{\text{tot}}$ ): 0.00083220 a.u.<sup>2</sup> (327.69290 (kcal/mol)<sup>2</sup>)  
Positive variance: 0.00072037 a.u.<sup>2</sup> (283.66104 (kcal/mol)<sup>2</sup>)  
Negative variance: 0.00011182 a.u.<sup>2</sup> (44.03186 (kcal/mol)<sup>2</sup>)  
Balance of charges ( $\mu$ ): 0.11631417  
Product of  $\sigma^2_{\text{tot}}$  and  $\mu$ : 0.00009680 a.u.<sup>2</sup> (38.11533 (kcal/mol)<sup>2</sup>)  
Internal charge separation ( $\Pi$ ): 0.03114414 a.u. (19.54326 kcal/mol)

### Compound MB2

Volume: 1041.20573 Bohr<sup>3</sup> (154.29080 Angstrom<sup>3</sup>)  
Minimal value: -21.61178 kcal/mol Maximal value: 49.34081 kcal/mol  
Overall surface area: 590.09004 Bohr<sup>2</sup> (165.24206 Angstrom<sup>2</sup>)  
Positive surface area: 306.40903 Bohr<sup>2</sup> (85.80328 Angstrom<sup>2</sup>)  
Negative surface area: 283.68100 Bohr<sup>2</sup> (79.43878 Angstrom<sup>2</sup>)  
Overall average value: 0.00878095 a.u. (5.51013 kcal/mol)  
Positive average value: 0.03329176 a.u. (20.89091 kcal/mol)  
Negative average value: -0.01769363 a.u. (-11.10293 kcal/mol)  
Overall variance ( $\sigma^2_{\text{tot}}$ ): 0.00054176 a.u.<sup>2</sup> (213.32948 (kcal/mol)<sup>2</sup>)  
Positive variance: 0.00046506 a.u.<sup>2</sup> (183.12594 (kcal/mol)<sup>2</sup>)  
Negative variance: 0.00007670 a.u.<sup>2</sup> (30.20354 (kcal/mol)<sup>2</sup>)  
Balance of charges ( $\mu$ ): 0.12153628  
Product of  $\sigma^2_{\text{tot}}$  and  $\mu$ : 0.00006584 a.u.<sup>2</sup> (25.92727 (kcal/mol)<sup>2</sup>)  
Internal charge separation ( $\Pi$ ): 0.02608210 a.u. (16.36678 kcal/mol)

### Compound MC1

Volume: 758.45848 Bohr<sup>3</sup> (112.39197 Angstrom<sup>3</sup>)  
Minimal value: -27.61371 kcal/mol Maximal value: 72.51762 kcal/mol  
Overall surface area: 448.21875 Bohr<sup>2</sup> (125.51405 Angstrom<sup>2</sup>)  
Positive surface area: 209.24989 Bohr<sup>2</sup> (58.59595 Angstrom<sup>2</sup>)  
Negative surface area: 238.96887 Bohr<sup>2</sup> (66.91811 Angstrom<sup>2</sup>)  
Overall average value: 0.00767180 a.u. (4.81413 kcal/mol)  
Positive average value: 0.03980689 a.u. (24.97922 kcal/mol)  
Negative average value: -0.02046687 a.u. (-12.84316 kcal/mol)  
Overall variance ( $\sigma^2_{\text{tot}}$ ): 0.00089459 a.u.<sup>2</sup> (352.26172 (kcal/mol)<sup>2</sup>)  
Positive variance: 0.00078180 a.u.<sup>2</sup> (307.84656 (kcal/mol)<sup>2</sup>)  
Negative variance: 0.00011280 a.u.<sup>2</sup> (44.41516 (kcal/mol)<sup>2</sup>)  
Balance of charges ( $\mu$ ): 0.11018809  
Product of  $\sigma^2_{\text{tot}}$  and  $\mu$ : 0.00009857 a.u.<sup>2</sup> (38.81505 (kcal/mol)<sup>2</sup>)  
Internal charge separation ( $\Pi$ ): 0.03050418 a.u. (19.14168 kcal/mol)

### Compound MC2

Volume: 797.72501 Bohr<sup>3</sup> (118.21068 Angstrom<sup>3</sup>)  
Minimal value: -21.85160 kcal/mol Maximal value: 46.63270 kcal/mol  
Overall surface area: 469.03403 Bohr<sup>2</sup> (131.34292 Angstrom<sup>2</sup>)  
Positive surface area: 243.12079 Bohr<sup>2</sup> (68.08077 Angstrom<sup>2</sup>)  
Negative surface area: 225.91324 Bohr<sup>2</sup> (63.26216 Angstrom<sup>2</sup>)  
Overall average value: 0.00786216 a.u. (4.93358 kcal/mol)  
Positive average value: 0.02987856 a.u. (18.74909 kcal/mol)  
Negative average value: -0.01583121 a.u. (-9.93424 kcal/mol)  
Overall variance (sigma<sup>2</sup>\_tot): 0.00049170 a.u.<sup>2</sup> (193.61698 (kcal/mol)<sup>2</sup>)  
Positive variance: 0.00041880 a.u.<sup>2</sup> (164.90843 (kcal/mol)<sup>2</sup>)  
Negative variance: 0.00007291 a.u.<sup>2</sup> (28.70854 (kcal/mol)<sup>2</sup>)  
Balance of charges (miu): 0.12628948  
Product of sigma<sup>2</sup>\_tot and miu: 0.00006210 a.u.<sup>2</sup> (24.45179 (kcal/mol)<sup>2</sup>)  
Internal charge separation (Pi): 0.02341033 a.u. (14.69022 kcal/mol)

### **Compound DA1**

Volume: 1945.22064 Bohr<sup>3</sup> (288.25202 Angstrom<sup>3</sup>)  
Minimal value: -20.78085 kcal/mol Maximal value: 68.85508 kcal/mol  
Overall surface area: 1008.47192 Bohr<sup>2</sup> (282.40094 Angstrom<sup>2</sup>)  
Positive surface area: 547.53082 Bohr<sup>2</sup> (153.32427 Angstrom<sup>2</sup>)  
Negative surface area: 460.94110 Bohr<sup>2</sup> (129.07667 Angstrom<sup>2</sup>)  
Overall average value: 0.01392378 a.u. (8.73731 kcal/mol)  
Positive average value: 0.04010491 a.u. (25.16623 kcal/mol)  
Negative average value: -0.01717558 a.u. (-10.77785 kcal/mol)  
Overall variance (sigma<sup>2</sup>\_tot): 0.00070289 a.u.<sup>2</sup> (276.77618 (kcal/mol)<sup>2</sup>)  
Positive variance: 0.00063388 a.u.<sup>2</sup> (249.60106 (kcal/mol)<sup>2</sup>)  
Negative variance: 0.00006901 a.u.<sup>2</sup> (27.17513 (kcal/mol)<sup>2</sup>)  
Balance of charges (miu): 0.08854429  
Product of sigma<sup>2</sup>\_tot and miu: 0.00006224 a.u.<sup>2</sup> (24.50695 (kcal/mol)<sup>2</sup>)  
Internal charge separation (Pi): 0.03003798 a.u. (18.84913 kcal/mol)

### **Compound DA2**

Volume: 2019.33820 Bohr<sup>3</sup> (299.23511 Angstrom<sup>3</sup>)  
Minimal value: -20.53350 kcal/mol Maximal value: 54.21938 kcal/mol  
Overall surface area: 1039.18310 Bohr<sup>2</sup> (291.00095 Angstrom<sup>2</sup>)  
Positive surface area: 572.55376 Bohr<sup>2</sup> (160.33141 Angstrom<sup>2</sup>)  
Negative surface area: 466.62933 Bohr<sup>2</sup> (130.66954 Angstrom<sup>2</sup>)  
Overall average value: 0.01257360 a.u. (7.89006 kcal/mol)  
Positive average value: 0.03531438 a.u. (22.16013 kcal/mol)  
Negative average value: -0.01532932 a.u. (-9.61930 kcal/mol)  
Overall variance (sigma<sup>2</sup>\_tot): 0.00057049 a.u.<sup>2</sup> (224.64109 (kcal/mol)<sup>2</sup>)  
Positive variance: 0.00050799 a.u.<sup>2</sup> (200.03080 (kcal/mol)<sup>2</sup>)

Negative variance: 0.00006250 a.u.<sup>2</sup> (24.61029 (kcal/mol)<sup>2</sup>)  
Balance of charges (miu): 0.09755179  
Product of sigma<sup>2</sup>\_tot and miu: 0.00005565 a.u.<sup>2</sup> (21.91414 (kcal/mol)<sup>2</sup>)  
Internal charge separation (Pi): 0.02641388 a.u. (16.57498 kcal/mol)

### Compound DB1

Volume: 1452.88345 Bohr<sup>3</sup> (215.29516 Angstrom<sup>3</sup>)  
Minimal value: -29.39084 kcal/mol Maximal value: 64.24724 kcal/mol  
Overall surface area: 782.04128 Bohr<sup>2</sup> (218.99389 Angstrom<sup>2</sup>)  
Positive surface area: 395.91315 Bohr<sup>2</sup> (110.86699 Angstrom<sup>2</sup>)  
Negative surface area: 386.12812 Bohr<sup>2</sup> (108.12690 Angstrom<sup>2</sup>)  
Overall average value: 0.00632659 a.u. (3.97000 kcal/mol)  
Positive average value: 0.03449806 a.u. (21.64788 kcal/mol)  
Negative average value: -0.02255878 a.u. (-14.15586 kcal/mol)  
Overall variance (sigma<sup>2</sup>\_tot): 0.00067474 a.u.<sup>2</sup> (265.68976 (kcal/mol)<sup>2</sup>)  
Positive variance: 0.00054138 a.u.<sup>2</sup> (213.17926 (kcal/mol)<sup>2</sup>)  
Negative variance: 0.00013335 a.u.<sup>2</sup> (52.51050 (kcal/mol)<sup>2</sup>)  
Balance of charges (miu): 0.15857746  
Product of sigma<sup>2</sup>\_tot and miu: 0.00010700 a.u.<sup>2</sup> (42.13241 (kcal/mol)<sup>2</sup>)  
Internal charge separation (Pi): 0.02883975 a.u. (18.09723 kcal/mol)

### Compound DB2

Volume: 1530.92883 Bohr<sup>3</sup> ( 26.86030 Angstrom<sup>3</sup>)  
Minimal value: -22.25468 kcal/mol Maximal value: 41.55718 kcal/mol  
Overall surface area: 823.81511 Bohr<sup>2</sup>(230.69176 Angstrom<sup>2</sup>)  
Positive surface area: 466.23938 Bohr<sup>2</sup>(130.56034 Angstrom<sup>2</sup>)  
Negative surface area: 357.57572 Bohr<sup>2</sup> (100.13141 Angstrom<sup>2</sup>)  
Overall average value: 0.00808927 a.u. (5.07610 kcal/mol)  
Positive average value: 0.02816180 a.u. (17.67181 kcal/mol)  
Negative average value: -0.01808310 a.u. (-11.34732 kcal/mol)  
Overall variance (sigma<sup>2</sup>\_tot): 0.00043271 a.u.<sup>2</sup> (170.38782 (kcal/mol)<sup>2</sup>)  
Positive variance: 0.00035671 a.u.<sup>2</sup> (140.45988 (kcal/mol)<sup>2</sup>)  
Negative variance: 0.00007600 a.u.<sup>2</sup> (29.92794 (kcal/mol)<sup>2</sup>)  
Balance of charges (miu): 0.14479449  
Product of sigma<sup>2</sup>\_tot and miu: 0.00006265 a.u.<sup>2</sup> (24.67122 (kcal/mol)<sup>2</sup>)  
Internal charge separation (Pi): 0.02330229 a.u. (14.62242 kcal/mol)

### Compound DC1

Volume: 966.80286 Bohr<sup>3</sup> (143.26543 Angstrom<sup>3</sup>)  
Minimal value: -30.14282 kcal/mol Maximal value: 65.23525 kcal/mol  
Overall surface area: 541.66315 Bohr<sup>2</sup> (151.68115 Angstrom<sup>2</sup>)

Positive surface area: 274.46728 Bohr<sup>2</sup> (76.85868 Angstrom<sup>2</sup>)  
Negative surface area: 267.19588 Bohr<sup>2</sup> (74.82248 Angstrom<sup>2</sup>)  
Overall average value: 0.00849216 a.u. (5.32892 kcal/mol)  
Positive average value: 0.03966251 a.u. (24.88862 kcal/mol)  
Negative average value: -0.02352645 a.u. (-14.76308 kcal/mol)  
Overall variance ( $\sigma^2_{tot}$ ): 0.00079617 a.u.<sup>2</sup> (313.50795 (kcal/mol)<sup>2</sup>)  
Positive variance: 0.00065554 a.u.<sup>2</sup> (258.13082 (kcal/mol)<sup>2</sup>)  
Negative variance: 0.00014063 a.u.<sup>2</sup> (55.37713 (kcal/mol)<sup>2</sup>)  
Balance of charges ( $\mu$ ): 0.14543642  
Product of  $\sigma^2_{tot}$  and  $\mu$ : 0.00011579 a.u.<sup>2</sup> (45.59547 (kcal/mol)<sup>2</sup>)  
Internal charge separation ( $\Pi$ ): 0.03208041 a.u. (20.13078 kcal/mol)

### Compound DC2

Volume: 1043.98025 Bohr<sup>3</sup> (154.70195 Angstrom<sup>3</sup>)  
Minimal value: -24.05070 kcal/mol Maximal value: 39.13179 kcal/mol  
Overall surface area: 581.15956 Bohr<sup>2</sup> (162.74127 Angstrom<sup>2</sup>)  
Positive surface area: 338.03430 Bohr<sup>2</sup> (94.65926 Angstrom<sup>2</sup>)  
Negative surface area: 243.12526 Bohr<sup>2</sup> (68.08202 Angstrom<sup>2</sup>)  
Overall average value: 0.00825081 a.u. (5.17746 kcal/mol)  
Positive average value: 0.02670583 a.u. (16.75818 kcal/mol)  
Negative average value: -0.01740852 a.u. (-10.92402 kcal/mol)  
Overall variance ( $\sigma^2_{tot}$ ): 0.00043328 a.u.<sup>2</sup> (170.61123 (kcal/mol)<sup>2</sup>)  
Positive variance: 0.00034334 a.u.<sup>2</sup> (135.19570 (kcal/mol)<sup>2</sup>)  
Negative variance: 0.00008994 a.u.<sup>2</sup> (35.41553 (kcal/mol)<sup>2</sup>)  
Balance of charges ( $\mu$ ): 0.16449072  
Product of  $\sigma^2_{tot}$  and  $\mu$ : 0.00007127 a.u.<sup>2</sup> ( 28.06396 (kcal/mol)<sup>2</sup>)  
Internal charge separation ( $\Pi$ ): 0.02209189 a.u. ( 13.86288 kcal/mol)

### Compound TA1

Volume: 2906.83684 Bohr<sup>3</sup> (430.74887 Angstrom<sup>3</sup>)  
Minimal value: -18.83521 kcal/mol Maximal value: 56.01930 kcal/mol  
Overall surface area: 1435.19191 Bohr<sup>2</sup> (401.89472 Angstrom<sup>2</sup>)  
Positive surface area: 803.17731 Bohr<sup>2</sup> (224.91259 Angstrom<sup>2</sup>)  
Negative surface area: 632.01460 Bohr<sup>2</sup> (176.98214 Angstrom<sup>2</sup>)  
Overall average value: 0.01733211 a.u. (10.87607 kcal/mol)  
Positive average value: 0.04369001 a.u. (27.41592 kcal/mol)  
Negative average value: -0.01616405 a.u. (-10.14311 kcal/mol)  
Overall variance ( $\sigma^2_{tot}$ ): 0.00066315 a.u.<sup>2</sup> (261.12724 (kcal/mol)<sup>2</sup>)  
Positive variance: 0.00060282 a.u.<sup>2</sup> (237.37115 (kcal/mol)<sup>2</sup>)  
Negative variance: 0.00006033 a.u.<sup>2</sup> (23.75609 (kcal/mol)<sup>2</sup>)  
Balance of charges ( $\mu$ ): 0.08269867  
Product of  $\sigma^2_{tot}$  and  $\mu$ : 0.00005484 a.u.<sup>2</sup> (21.59487 (kcal/mol)<sup>2</sup>)

Internal charge separation (Pi): 0.03170842 a.u. (19.89735 kcal/mol)

### **Compound TA2 :**

Volume: 3074.05051 Bohr<sup>3</sup> (455.52739 Angstrom<sup>3</sup>)

Minimal value: -19.68635 kcal/mol Maximal value: 58.42148 kcal/mol

Overall surface area: 1532.00390 Bohr<sup>2</sup> (429.00485 Angstrom<sup>2</sup>)

Positive surface area: 903.12636 Bohr<sup>2</sup> (252.90118 Angstrom<sup>2</sup>)

Negative surface area: 628.87753 Bohr<sup>2</sup> (176.10367 Angstrom<sup>2</sup>)

Overall average value: 0.01694446 a.u. (10.63282 kcal/mol)

Positive average value: 0.03823968 a.u. (23.99578 kcal/mol)

Negative average value: -0.01363745 a.u. (-8.55764 kcal/mol)

Overall variance (sigma<sup>2</sup>\_tot): 0.00059216 a.u.<sup>2</sup> (233.17479 (kcal/mol)<sup>2</sup>)

Positive variance: 0.00054073 a.u.<sup>2</sup> (212.92135 (kcal/mol)<sup>2</sup>)

Negative variance: 0.00005143 a.u.<sup>2</sup> (20.25344 (kcal/mol)<sup>2</sup>)

Balance of charges (miu): 0.07931491

Product of sigma<sup>2</sup>\_tot and miu: 0.00004697 a.u.<sup>2</sup> (18.49424 (kcal/mol)<sup>2</sup>)

Internal charge separation (Pi): 0.02768148 a.u. (17.37041 kcal/mol)

### **Compound TB1**

Volume: 2217.58109 Bohr<sup>3</sup> (328.61168 Angstrom<sup>3</sup>)

Minimal value: -24.85803 kcal/mol Maximal value: 65.42844 kcal/mol

Overall surface area: 1140.66622 Bohr<sup>2</sup> (319.41912 Angstrom<sup>2</sup>)

Positive surface area: 571.17585 Bohr<sup>2</sup> (159.94555 Angstrom<sup>2</sup>)

Negative surface area: 569.49036 Bohr<sup>2</sup> (159.47357 Angstrom<sup>2</sup>)

Overall average value: 0.00653819 a.u. (4.10278 kcal/mol)

Positive average value: 0.03262490 a.u. (20.47245 kcal/mol)

Negative average value: -0.01962573 a.u. (-12.31534 kcal/mol)

Overall variance (sigma<sup>2</sup>\_tot): 0.00069425 a.u.<sup>2</sup> ( (kcal/mol)<sup>2</sup>)

Positive variance: 0.00058895 a.u.<sup>2</sup> (231.90887 (kcal/mol)<sup>2</sup>)

Negative variance: 0.00010530 a.u.<sup>2</sup> (41.46336 (kcal/mol)<sup>2</sup>)

Balance of charges (miu): 0.12866874

Product of sigma<sup>2</sup>\_tot and miu: 0.00008933 a.u.<sup>2</sup> (35.17446 (kcal/mol)<sup>2</sup>)

Internal charge separation (Pi): 0.02653995 a.u. (16.65408 kcal/mol)

### **Compound TB2**

Volume: 2334.97192 Bohr<sup>3</sup> (346.00722 Angstrom<sup>3</sup>)

Minimal value: -19.49760 kcal/mol Maximal value: 43.06441 kcal/mol

Overall surface area: 1204.42582 Bohr<sup>2</sup> (337.27363 Angstrom<sup>2</sup>)

Positive surface area: 728.11938 Bohr<sup>2</sup> (203.89422 Angstrom<sup>2</sup>)

Negative surface area: 476.30644 Bohr<sup>2</sup> (133.37941 Angstrom<sup>2</sup>)

Overall average value: 0.00966833 a.u. (6.06697 kcal/mol)



Positive average value: 0.02618258 a.u. (16.42983 kcal/mol)  
Negative average value: -0.01557664 a.u. (-9.77450 kcal/mol)  
Overall variance ( $\sigma^2_{\text{tot}}$ ): 0.00038827 a.u.<sup>2</sup> (152.88983 (kcal/mol)<sup>2</sup>)  
Positive variance: 0.00032027 a.u.<sup>2</sup> (126.11267 (kcal/mol)<sup>2</sup>)  
Negative variance: 0.00006800 a.u.<sup>2</sup> (26.77716 (kcal/mol)<sup>2</sup>)  
Balance of charges ( $\mu$ ): 0.14446614  
Product of  $\sigma^2_{\text{tot}}$  and  $\mu$ : 0.00005609 a.u.<sup>2</sup> (22.08740 (kcal/mol)<sup>2</sup>)  
Internal charge separation ( $\Pi$ ): 0.02101354 a.u. (13.18621 kcal/mol)

### **Compound TC1**

Volume: 1447.70039 Bohr<sup>3</sup> (214.52711 Angstrom<sup>3</sup>)  
Minimal value: -26.09009 kcal/mol Maximal value: 50.93846 kcal/mol  
Overall surface area: 741.36041 Bohr<sup>2</sup> (207.60209 Angstrom<sup>2</sup>)  
Positive surface area: 427.96867 Bohr<sup>2</sup> (119.84345 Angstrom<sup>2</sup>)  
Negative surface area: 313.39173 Bohr<sup>2</sup> (87.75864 Angstrom<sup>2</sup>)  
Overall average value: 0.01190513 a.u. (7.47059 kcal/mol)  
Positive average value: 0.03539949 a.u. (22.21353 kcal/mol)  
Negative average value: -0.02017884 a.u. (-12.66242 kcal/mol)  
Overall variance ( $\sigma^2_{\text{tot}}$ ): 0.00052833 a.u.<sup>2</sup> (208.03858 (kcal/mol)<sup>2</sup>)  
Positive variance: 0.00040739 a.u.<sup>2</sup> (160.41787 (kcal/mol)<sup>2</sup>)  
Negative variance: 0.00012094 a.u.<sup>2</sup> (47.62070 (kcal/mol)<sup>2</sup>)  
Balance of charges ( $\mu$ ): 0.17650654  
Product of  $\sigma^2_{\text{tot}}$  and  $\mu$ : 0.00009325 a.u.<sup>2</sup> (36.72017 (kcal/mol)<sup>2</sup>)  
Internal charge separation ( $\Pi$ ): 0.02834593 a.u. (17.78736 kcal/mol)

### **Compound TC2**

Volume: 1612.07542 Bohr<sup>3</sup> (238.88498 Angstrom<sup>3</sup>)  
Estimated density according to mass and volume: 1.9124 g/cm<sup>3</sup>  
Minimal value: -24.43607 kcal/mol Maximal value: 51.76366 kcal/mol  
Overall surface area: 844.59867 Bohr<sup>2</sup> (236.51175 Angstrom<sup>2</sup>)  
Positive surface area: 508.60445 Bohr<sup>2</sup> (142.42377 Angstrom<sup>2</sup>)  
Negative surface area: 335.99422 Bohr<sup>2</sup> (94.08798 Angstrom<sup>2</sup>)  
Overall average value: 0.01162547 a.u. (7.29510 kcal/mol)  
Positive average value: 0.02964808 a.u. (18.60446 kcal/mol)  
Negative average value: -0.01565590 a.u. (-9.82423 kcal/mol)  
Overall variance ( $\sigma^2_{\text{tot}}$ ): 0.00038439 a.u.<sup>2</sup> (151.36069 (kcal/mol)<sup>2</sup>)  
Positive variance: 0.00030457 a.u.<sup>2</sup> (119.92904 (kcal/mol)<sup>2</sup>)  
Negative variance: 0.00007982 a.u.<sup>2</sup> (31.43166 (kcal/mol)<sup>2</sup>)  
Balance of charges ( $\mu$ ): 0.16453769  
Product of  $\sigma^2_{\text{tot}}$  and  $\mu$ : 0.00006325 a.u.<sup>2</sup> (24.90454 (kcal/mol)<sup>2</sup>)  
Internal charge separation ( $\Pi$ ): 0.02282237 a.u. (14.32127 kcal/mol)

### **MA3 anion:**

Volume: 1279.74657 Bohr<sup>3</sup> (189.63892 Angstrom<sup>3</sup>)

Estimated density according to mass and volume: 1.7693 g/cm<sup>3</sup>  
Minimal value: -107.91492 kcal/mol Maximal value: -55.87074 kcal/mol  
Overall surface area: 690.50574 Bohr<sup>2</sup> (193.36133 Angstrom<sup>2</sup>)  
Positive surface area: 0.00000 Bohr<sup>2</sup> (0.00000 Angstrom<sup>2</sup>)  
Negative surface area: 690.50574 Bohr<sup>2</sup> (193.36133 Angstrom<sup>2</sup>)  
Overall average value: -0.13171476 a.u. (-82.65233 kcal/mol)  
Positive average value: NaN a.u. (NaN kcal/mol)  
Negative average value: -0.13171476 a.u. (-82.65233 kcal/mol)  
Overall variance (sigma<sup>2</sup>\_tot): 0.00029689 a.u.<sup>2</sup> (116.90794 (kcal/mol)<sup>2</sup>)  
Positive variance: 0.00000000 a.u.<sup>2</sup> (0.00000 (kcal/mol)<sup>2</sup>)  
Negative variance: 0.00029689 a.u.<sup>2</sup> (116.90794 (kcal/mol)<sup>2</sup>)  
Balance of charges (miu): 0.00000000  
Product of sigma<sup>2</sup>\_tot and miu: 0.00000000 a.u.<sup>2</sup> (0.00000 (kcal/mol)<sup>2</sup>)  
Internal charge separation (Pi): 0.01359900 a.u. (8.53351 kcal/mol)

### **MB3 anion:**

Volume: 1038.23191 Bohr<sup>3</sup> (153.85013 Angstrom<sup>3</sup>)  
Estimated density according to mass and volume: 1.7059 g/cm<sup>3</sup>  
Minimal value: -113.96418 kcal/mol Maximal value: -61.04470 kcal/mol  
Overall surface area: 580.13742 Bohr<sup>2</sup> (162.45505 Angstrom<sup>2</sup>)  
Positive surface area: 0.00000 Bohr<sup>2</sup> (0.00000 Angstrom<sup>2</sup>)  
Negative surface area: 580.13742 Bohr<sup>2</sup> (162.45505 Angstrom<sup>2</sup>)  
Overall average value: -0.14366820 a.u. (-90.15323 kcal/mol)  
Positive average value: NaN a.u. (NaN kcal/mol)  
Negative average value: -0.14366820 a.u. (-90.15323 kcal/mol)  
Overall variance (sigma<sup>2</sup>\_tot): 0.00035966 a.u.<sup>2</sup> (141.62191 (kcal/mol)<sup>2</sup>)  
Positive variance: 0.00000000 a.u.<sup>2</sup> (0.00000 (kcal/mol)<sup>2</sup>)  
Negative variance: 0.00035966 a.u.<sup>2</sup> (141.62191 (kcal/mol)<sup>2</sup>)  
Balance of charges (miu): 0.00000000  
Product of sigma<sup>2</sup>\_tot and miu: 0.00000000 a.u.<sup>2</sup> (0.00000 (kcal/mol)<sup>2</sup>)  
Internal charge separation (Pi): 0.01457687 a.u. (9.14713 kcal/mol)

### **MC3 anion:**

Volume: 797.79341 Bohr<sup>3</sup> (118.22081 Angstrom<sup>3</sup>)  
Estimated density according to mass and volume: 1.6019 g/cm<sup>3</sup>  
Minimal value: -120.40369 kcal/mol Maximal value: -69.57497 kcal/mol  
Overall surface area: 461.88430 Bohr<sup>2</sup> (129.34080 Angstrom<sup>2</sup>)  
Positive surface area: 0.00000 Bohr<sup>2</sup> (0.00000 Angstrom<sup>2</sup>)  
Negative surface area: 461.88430 Bohr<sup>2</sup> (129.34080 Angstrom<sup>2</sup>)  
Overall average value: -0.16126228 a.u. (-101.19369 kcal/mol)  
Positive average value: NaN a.u. (NaN kcal/mol)  
Negative average value: -0.16126228 a.u. (-101.19369 kcal/mol)  
Overall variance (sigma<sup>2</sup>\_tot): 0.00029397 a.u.<sup>2</sup> (115.75683 (kcal/mol)<sup>2</sup>)  
Positive variance: 0.00000000 a.u.<sup>2</sup> (0.00000 (kcal/mol)<sup>2</sup>)

Negative variance: 0.00029397 a.u.<sup>2</sup> ( 115.75683 (kcal/mol)<sup>2</sup>)  
Balance of charges (miu): 0.00000000  
Product of sigma<sup>2</sup>\_tot and miu: 0.00000000 a.u.<sup>2</sup> (0.00000 (kcal/mol)<sup>2</sup>)  
Internal charge separation (Pi): 0.01417122 a.u. (8.89258 kcal/mol)

### **DA3 anion:**

Volume: 2013.84699 Bohr<sup>3</sup> (298.42140 Angstrom<sup>3</sup>)  
Estimated density according to mass and volume: 1.7367 g/cm<sup>3</sup>  
Minimal value: -178.44394 kcal/mol Maximal value: -116.53200 kcal/mol  
Overall surface area: 1023.36120 Bohr<sup>2</sup> (286.57036 Angstrom<sup>2</sup>)  
Positive surface area: 0.00000 Bohr<sup>2</sup> (0.00000 Angstrom<sup>2</sup>)  
Negative surface area: 1023.36120 Bohr<sup>2</sup> (286.57036 Angstrom<sup>2</sup>)  
Overall average value: -0.22228810 a.u. (-139.48801 kcal/mol)  
Positive average value: NaN a.u. (NaN kcal/mol)  
Negative average value: -0.22228810 a.u. (-139.48801 kcal/mol)  
Overall variance (sigma<sup>2</sup>\_tot): 0.00036477 a.u.<sup>2</sup> (143.63345 (kcal/mol)<sup>2</sup>)  
Positive variance: 0.00000000 a.u.<sup>2</sup> (0.00000 (kcal/mol)<sup>2</sup>)  
Negative variance: 0.00036477 a.u.<sup>2</sup> (143.63345 (kcal/mol)<sup>2</sup>)  
Balance of charges (miu): 0.00000000  
Product of sigma<sup>2</sup>\_tot and miu: 0.00000000 a.u.<sup>2</sup> (0.00000 (kcal/mol)<sup>2</sup>)  
Internal charge separation (Pi): 0.01413093 a.u. (8.86730 kcal/mol)

### **DB3 anion:**

Volume: 1535.23553 Bohr<sup>3</sup> (227.49848 Angstrom<sup>3</sup>)  
Estimated density according to mass and volume: 1.6357 g/cm<sup>3</sup>  
Minimal value: -191.20334 kcal/mol Maximal value: -126.92306 kcal/mol  
Overall surface area: 806.20684 Bohr<sup>2</sup> (225.76094 Angstrom<sup>2</sup>)  
Positive surface area: 0.00000 Bohr<sup>2</sup> (0.00000 Angstrom<sup>2</sup>)  
Negative surface area: 806.20684 Bohr<sup>2</sup> ( 225.76094 Angstrom<sup>2</sup>)  
Overall average value: -0.24787202 a.u. (-155.54217 kcal/mol)  
Positive average value: NaN a.u. (NaN kcal/mol)  
Negative average value: -0.24787202 a.u. (-155.54217 kcal/mol)  
Overall variance (sigma<sup>2</sup>\_tot): 0.00047538 a.u.<sup>2</sup> (187.18912 (kcal/mol)<sup>2</sup>)  
Positive variance: 0.00000000 a.u.<sup>2</sup> (0.00000 (kcal/mol)<sup>2</sup>)  
Negative variance: 0.00047538 a.u.<sup>2</sup> (187.18912 (kcal/mol)<sup>2</sup>)  
Balance of charges (miu): 0.00000000  
Product of sigma<sup>2</sup>\_tot and miu: 0.00000000 a.u.<sup>2</sup> (0.00000 (kcal/mol)<sup>2</sup>)  
Internal charge separation (Pi): 0.01847348 a.u. (11.59230 kcal/mol)

### **DC3 anion:**

Volume: 1063.42398 Bohr<sup>3</sup> (157.58321 Angstrom<sup>3</sup>)  
Estimated density according to mass and volume: 1.4339 g/cm<sup>3</sup>  
Minimal value: -210.79858 kcal/mol Maximal value: -176.03586 kcal/mol  
Overall surface area: 574.79324 Bohr<sup>2</sup> (160.95852 Angstrom<sup>2</sup>)

Positive surface area: 0.00000 Bohr<sup>2</sup> (0.00000 Angstrom<sup>2</sup>)  
Negative surface area: 574.79324 Bohr<sup>2</sup> (160.95852 Angstrom<sup>2</sup>)  
Overall average value: -0.29375109 a.u. (-184.33175 kcal/mol)  
Positive average value: NaN a.u. (NaN kcal/mol)  
Negative average value: -0.29375109 a.u. (-184.33175 kcal/mol)  
Overall variance ( $\sigma^2_{tot}$ ): 0.00013655 a.u.<sup>2</sup> (53.76893 (kcal/mol)<sup>2</sup>)  
Positive variance: 0.00000000 a.u.<sup>2</sup> (0.00000 (kcal/mol)<sup>2</sup>)  
Negative variance: 0.00013655 a.u.<sup>2</sup> ( 53.76893 (kcal/mol)<sup>2</sup>)  
Balance of charges ( $\mu$ ): 0.00000000  
Product of  $\sigma^2_{tot}$  and  $\mu$ : 0.00000000 a.u.<sup>2</sup> ( 0.00000 (kcal/mol)<sup>2</sup>)  
Internal charge separation ( $\Pi$ ): 0.00928352 a.u. (5.82550 kcal/mol)

### **TA3 anion:**

Volume: 3063.85059 Bohr<sup>3</sup> (454.01591 Angstrom<sup>3</sup>)  
Estimated density according to mass and volume: 1.7635 g/cm<sup>3</sup>  
Minimal value: -209.62527 kcal/mol Maximal value: -157.42359 kcal/mol  
Overall surface area: 1507.80556 Bohr<sup>2</sup> (422.22862 Angstrom<sup>2</sup>)  
Positive surface area: 0.00000 Bohr<sup>2</sup> (0.00000 Angstrom<sup>2</sup>)  
Negative surface area: 1507.80556 Bohr<sup>2</sup> (422.22862 Angstrom<sup>2</sup>)  
Overall average value: -0.28635540 a.u. (-179.69088 kcal/mol)  
Positive average value: NaN a.u. (NaN kcal/mol)  
Negative average value: -0.28635540 a.u. (-179.69088 kcal/mol)  
Overall variance ( $\sigma^2_{tot}$ ): 0.00039787 a.u.<sup>2</sup> (156.66935 (kcal/mol)<sup>2</sup>)  
Positive variance: 0.00000000 a.u.<sup>2</sup> (0.00000 (kcal/mol)<sup>2</sup>)  
Negative variance: 0.00039787 a.u.<sup>2</sup> (156.66935 (kcal/mol)<sup>2</sup>)  
Balance of charges ( $\mu$ ): 0.00000000  
Product of  $\sigma^2_{tot}$  and  $\mu$ : 0.00000000 a.u.<sup>2</sup> (0.00000 (kcal/mol)<sup>2</sup>)  
Internal charge separation ( $\Pi$ ): 0.01646817 a.u. ( 10.33394 kcal/mol)

### **TB3 anion:**

Volume: 2349.66249 Bohr<sup>3</sup> (348.18413 Angstrom<sup>3</sup>)  
Estimated density according to mass and volume: 1.6699 g/cm<sup>3</sup>  
Minimal value: -225.79030 kcal/mol Maximal value: -170.53853 kcal/mol  
Overall surface area: 1184.79051 Bohr<sup>2</sup> (331.77518 Angstrom<sup>2</sup>)  
Positive surface area: 0.00000 Bohr<sup>2</sup> (0.00000 Angstrom<sup>2</sup>)  
Negative surface area: 1184.79051 Bohr<sup>2</sup> (331.77518 Angstrom<sup>2</sup>)  
Overall average value: -0.31699270 a.u. (-198.91609 kcal/mol)  
Positive average value: NaN a.u. (NaN kcal/mol)  
Negative average value: -0.31699270 a.u. (-198.91609 kcal/mol)  
Overall variance ( $\sigma^2_{tot}$ ): 0.00054246 a.u.<sup>2</sup> (213.60311 (kcal/mol)<sup>2</sup>)  
Positive variance: 0.00000000 a.u.<sup>2</sup> (0.00000 (kcal/mol)<sup>2</sup>)  
Negative variance: 0.00054246 a.u.<sup>2</sup> (213.60311 (kcal/mol)<sup>2</sup>)  
Balance of charges ( $\mu$ ): 0.00000000  
Product of  $\sigma^2_{tot}$  and  $\mu$ : 0.00000000 a.u.<sup>2</sup> (0.00000 (kcal/mol)<sup>2</sup>)

Internal charge separation (Pi): 0.02084066 a.u. (13.07772 kcal/mol)

### **TC3 anion:**

Volume: 1649.66108 Bohr<sup>3</sup> (244.45460 Angstrom<sup>3</sup>)

Estimated density according to mass and volume: 1.4816 g/cm<sup>3</sup>

Minimal value: -255.54724 kcal/mol Maximal value: -220.87100 kcal/mol

Overall surface area: 843.19264 Bohr<sup>2</sup> (236.11802 Angstrom<sup>2</sup>)

Positive surface area: 0.00000 Bohr<sup>2</sup> (0.00000 Angstrom<sup>2</sup>)

Negative surface area: 843.19264 Bohr<sup>2</sup> (236.11802 Angstrom<sup>2</sup>)

Overall average value: -0.37621358 a.u. (-236.07778 kcal/mol)

Positive average value: NaN a.u. (NaN kcal/mol)

Negative average value: -0.37621358 a.u. (-236.07778 kcal/mol)

Overall variance (sigma<sup>2</sup>\_tot): 0.00026540 a.u.<sup>2</sup> (104.50459 (kcal/mol)<sup>2</sup>)

Positive variance: 0.00000000 a.u.<sup>2</sup> (0.00000 (kcal/mol)<sup>2</sup>)

Negative variance: 0.00026540 a.u.<sup>2</sup> (104.50459 (kcal/mol)<sup>2</sup>)

Balance of charges (miu): 0.00000000

Product of sigma<sup>2</sup>\_tot and miu: 0.00000000 a.u.<sup>2</sup> (0.00000 (kcal/mol)<sup>2</sup>)

Internal charge separation (Pi): 0.01388374 a.u. (8.71219 kcal/mol)

### **Hydroxylammonium cation:**

Volume: 291.52729 Bohr<sup>3</sup> (43.19990 Angstrom<sup>3</sup>)

Estimated density according to mass and volume: 1.3084 g/cm<sup>3</sup>

Minimal value: 83.33440 kcal/mol Maximal value: 187.12046 kcal/mol

Overall surface area: 223.16346 Bohr<sup>2</sup> (62.49214 Angstrom<sup>2</sup>)

Positive surface area: 223.16346 Bohr<sup>2</sup> (62.49214 Angstrom<sup>2</sup>)

Negative surface area: 0.00000 Bohr<sup>2</sup> (0.00000 Angstrom<sup>2</sup>)

Overall average value: 0.24160362 a.u. (151.60869 kcal/mol)

Positive average value: 0.24160362 a.u. (151.60869 kcal/mol)

Negative average value: NaN a.u. (NaN kcal/mol)

Overall variance (sigma<sup>2</sup>\_tot): 0.00250511 a.u.<sup>2</sup> ( 986.43403 (kcal/mol)<sup>2</sup>)

Positive variance: 0.00250511 a.u.<sup>2</sup> ( 986.43403 (kcal/mol)<sup>2</sup>)

Negative variance: 0.00000000 a.u.<sup>2</sup> ( 0.00000 (kcal/mol)<sup>2</sup>)

Balance of charges (miu): 0.00000000

Product of sigma<sup>2</sup>\_tot and miu: 0.00000000 a.u.<sup>2</sup> (0.00000 (kcal/mol)<sup>2</sup>)

Internal charge separation (Pi): 0.04316710 a.u. (27.08779 kcal/mol)

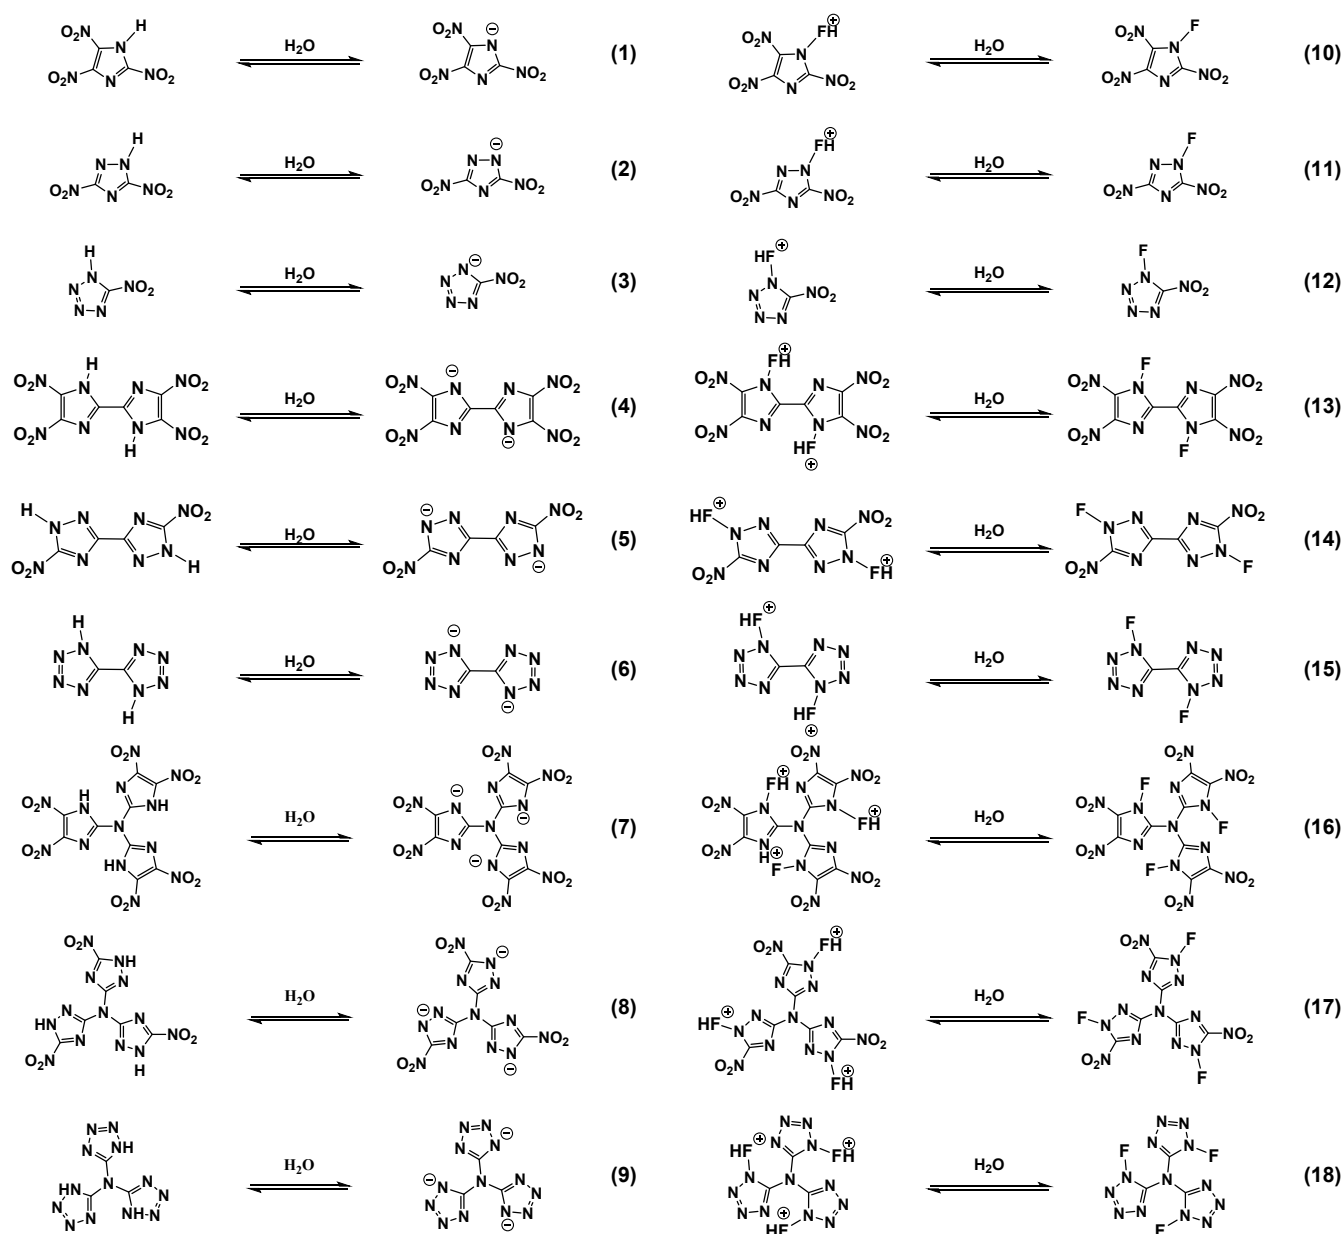

**Scheme S2** The deprotonation reaction of parent compounds and N-fluorination compounds.
